# Supplementary material for: TIGIT blockade enhances NK cell activity against autologous HIV‐1‐infected CD4+ T cells
Source: PubMed Central journal article supplement — Clin Transl Immunology. 2021 Oct 19;10(10):e1348. doi: 10.1002/cti2.1348 (PMC8527024; doi:10.1002/cti2.1348), 2021-10-19
Supplement: CTI2-10-e1348-s001.pdf [file CTI2-10-e1348-s001.pdf]

## Supplementary Figure 1

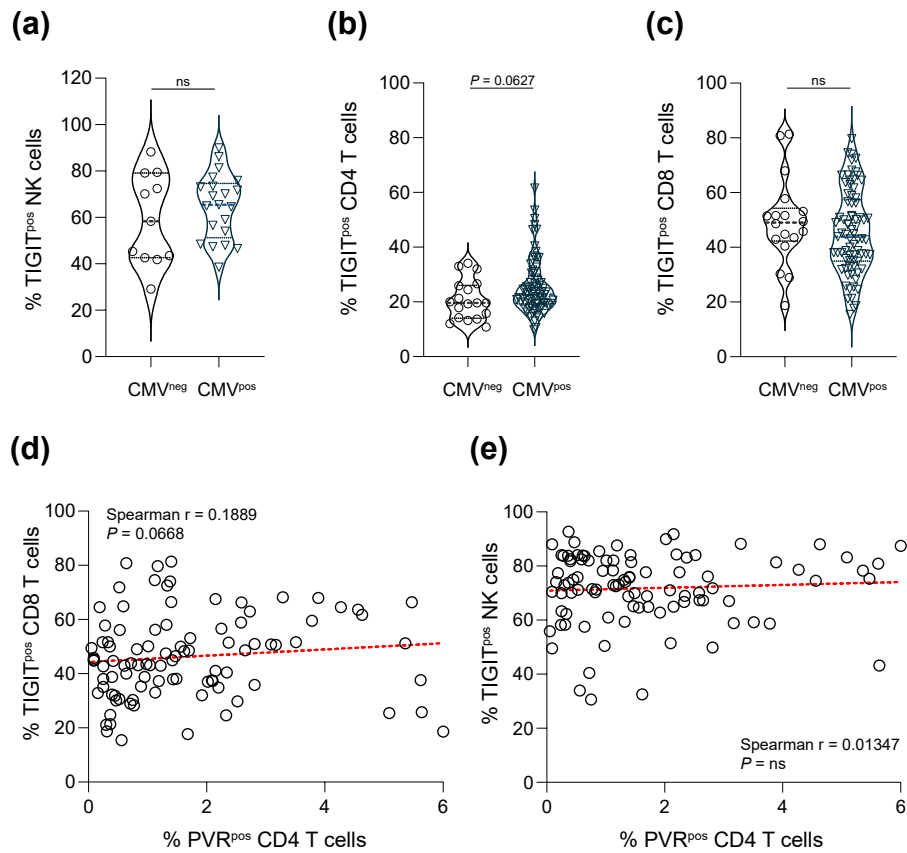

**Supplementary Figure 1 | TIGIT expression on lymphocytes from CMV-seronegative and CMV-seropositive participants.** (a) Six additional CMV-seronegative individuals were included for more robust comparison of TIGIT expression on NK cells from CMV-seronegative ( $n = 11$ ) and CMV-seropositive ( $n = 21$ ) HIV-seronegative individuals. CMV-seronegative individuals were 64% male with mean age of 49.3 years, whereas CMV-seropositive individuals were 73% male with mean age of 52.0 years. Student's  $t$ -test ns. The CMV serostatus of PLWH was determined and (b) CD4<sup>+</sup> T cell or (c) CD8<sup>+</sup> T cell TIGIT expression for those who were CMV-seronegative ( $n = 18$ ) was compared to those who were CMV-seropositive ( $n = 77$ ). Mann-Whitney  $U$ -test  $P = 0.0627$ ; Student's  $t$ -test ns. Correlation between CD4<sup>+</sup> T cell PVR and percentage of (d) CD8<sup>+</sup> T cell and (e) NK cell TIGIT expression is depicted. Horizontal lines bisecting groups in (a – c) represent median with IQR.

## Supplementary Figure 2

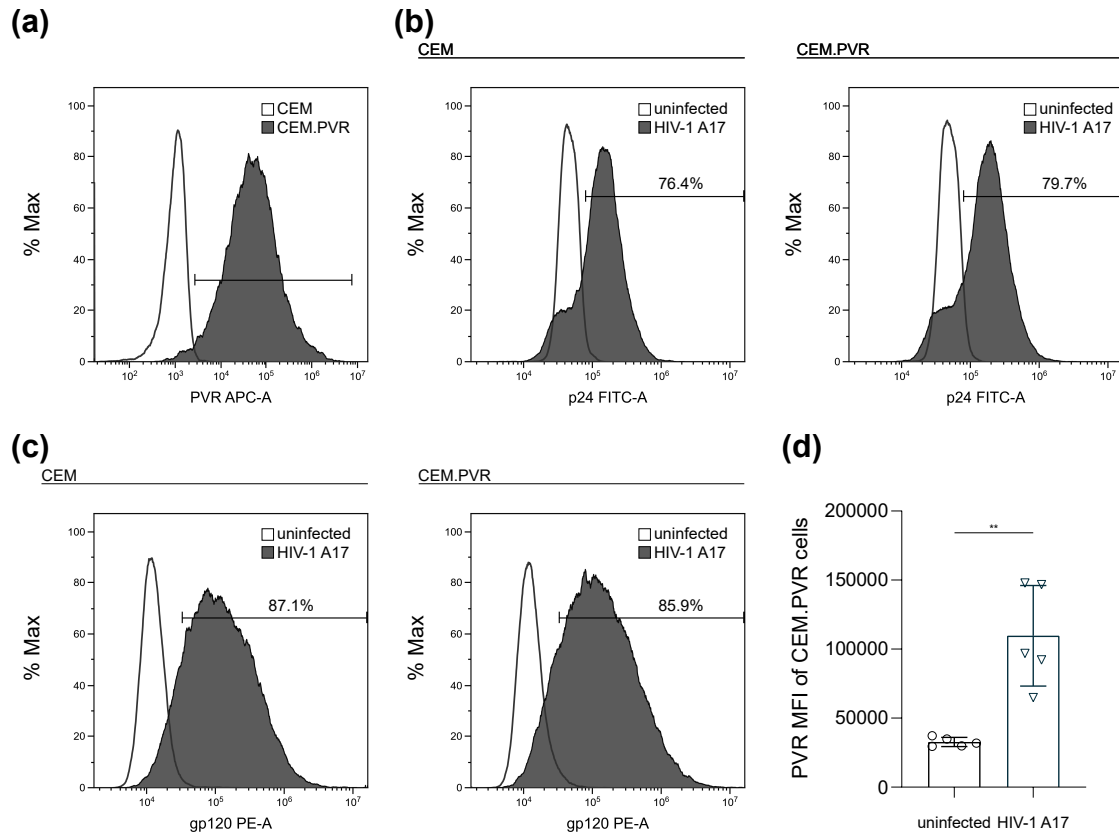

**Supplementary Figure 2 | PVR and HIV-1 antigen expression on CEM.NKR-CCR5 cells.** Representative histograms from five independent experiments demonstrate **(a)** expression of PVR [median (IQR) 92.3% (5.1%)] on CEM.NKR-CCR5 PVR<sup>+</sup> (CEM.PVR) cells and relative levels of HIV-1 **(b)** p24 and **(c)** gp120 on CEM.NKR-CCR5 (CEM) and CEM.PVR cells 96 h after HIV-1 A17 infection. The impact of active HIV-1 infection on PVR expression was measured and **(d)** summarized based on MFI of PVR expression (n = 5) on uninfected CEM.PVR cells compared to CEM.PVR cells infected with HIV-1 A17 for 96 h. Student's *t*-test **\*\****P* = 0.0015. Error bars in **(d)** represent SD.

### Supplementary Figure 3

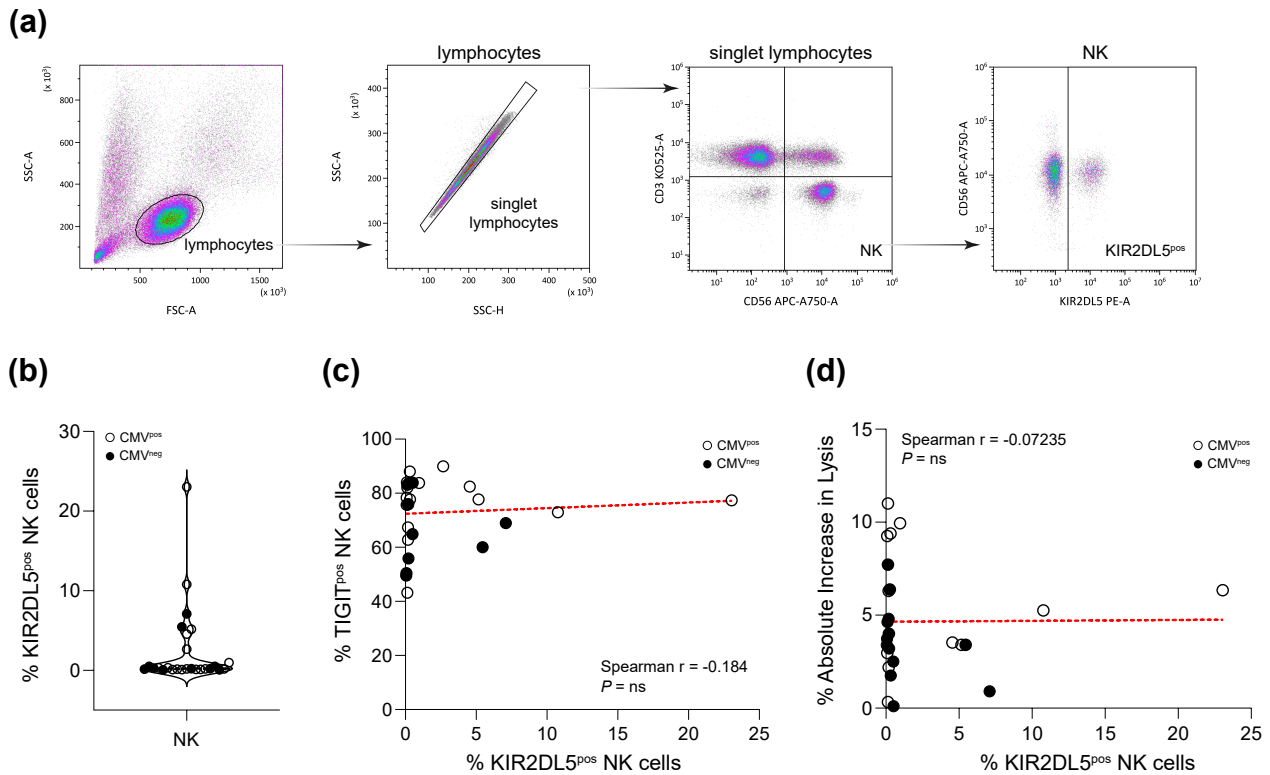

**Supplementary Figure 3 | Expression of NK cell KIR2DL5 within the functionally studied PLWH cohort.** **(a)** NK cells were defined as CD3<sup>+</sup>CD56<sup>+</sup> singlet lymphocytes and KIR2DL5<sup>+</sup> NK cells identified. **(b)** Summary data of NK cell KIR2DL5 expression for PLWH within the functionally studied cohort. Correlations between the percentage of NK cells expressing KIR2DL5 and **(c)** TIGIT or **(d)** absolute increase in % specific lysis (raw data from Figure 4c) in the presence of anti-TIGIT mAb vs IgG<sub>1</sub> are depicted. For all graphs, filled symbols represent CMV-seronegative (n = 10) participants while open symbols depict CMV-seropositive participants (n = 16). Horizontal lines bisecting groups in **(b)** represent median with IQR.
